# Supplementary material for: A novel molecular imaging probe 99m Tc-HYNIC-FAPI targeting cancer- associated fibroblasts
Source: Research Square preprint supplement (doi:10.21203/rs.3.rs-2222626/v1), 2022-11-11
Supplement: Supplementary file 1 [file 106a0cfa5219ea9a900f29ff.xlsx]

## Sheet: Sheet1
time(h)	Saline RT		Saline 37℃		Serum RT		Serum 37℃
0	97.541	97.161	97.161	95.43	96.232	95.196	96.353	94.103
1	95.241	96.734	96.734	96.153	96.236	98.052	97.935	97.725
2	95.461	98.905	98.905	95.295	98.397	95.105	97.141	98.107
4	97.057	97.988	97.988	94.989	96.977	94.769	98.067	96.207
6	94.693	94.838	94.838	94.467	97.512	93.368	96.187	94.266
