# Supplementary material for: A novel molecular imaging probe 99m Tc-HYNIC-FAPI targeting cancer- associated fibroblasts
Source: Research Square preprint supplement (doi:10.21203/rs.3.rs-2222626/v1), 2022-11-11
Supplement: Supplementary file 2 [file 12bcfc9377de295eb5a3f644.xlsx]

## Sheet: Sheet1
3h		99mtc-HYNIC-FAPI		block		control
		MCF-7-FAP				MCF-7
		counts	uptake rate%	counts	uptake rate%	counts	uptake rate%
A	medium	835795	0.0174	936234	0.0123	1.06962e+06	0.005
	cell	14801.4		11654.7		5322.45
B	medium	862753	0.0156	1.08056e+06	0.0119	1.09264e+06	0.0036
	cell	13695.8		13046.3		3949.8
C	medium	1.01158e+06	0.01785	1.11934e+06	0.0136	1.02071e+06	0.0049
	cell	18374.5		15401.1		5064.54
uptake rate%=cells counts/(cells counts+medium counts)*100%
