# Supplementary material for: A novel molecular imaging probe 99m Tc-HYNIC-FAPI targeting cancer- associated fibroblasts
Source: Research Square preprint supplement (doi:10.21203/rs.3.rs-2222626/v1), 2022-11-11
Supplement: Supplementary file 4 [file 216802e247cdebfab761d628.xlsx]

## Sheet: FIGURE 5D PANC-1
PANC-1	0h area	24h area	migration area(%)
99mTc-HYNIC-FAPI	189.405	117.695	0.378607
	97.348	62.551	0.35745
	110.67	83.671	0.24396
block	86.113	43.973	0.489357
	105.038	50.079	0.52323
	104.914	45.101	0.570115
99mTc	92.203	34.728	0.623353
	203.313	84.011	0.58679
	92.513	25.062	0.729098
migration area(%)=(24h area-0h area)/0h area*100%
