# Supplementary material for: A novel molecular imaging probe 99m Tc-HYNIC-FAPI targeting cancer- associated fibroblasts
Source: Research Square preprint supplement (doi:10.21203/rs.3.rs-2222626/v1), 2022-11-11

**FIGURE 2 raw data**

**FIGURE2 A ITLC 99mTc**


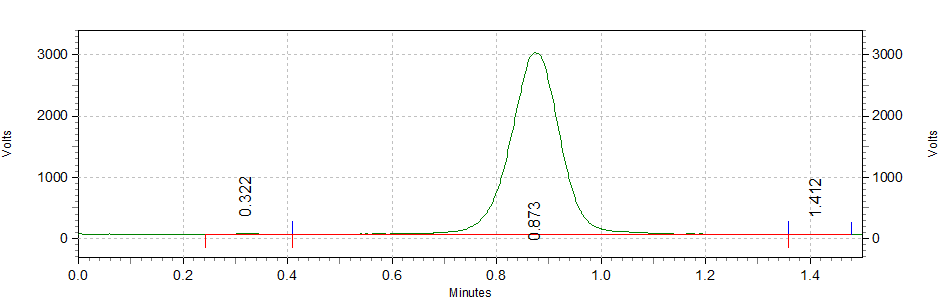


**FIGURE2 B ITLC 99mTc-HYNIC-FAPI**


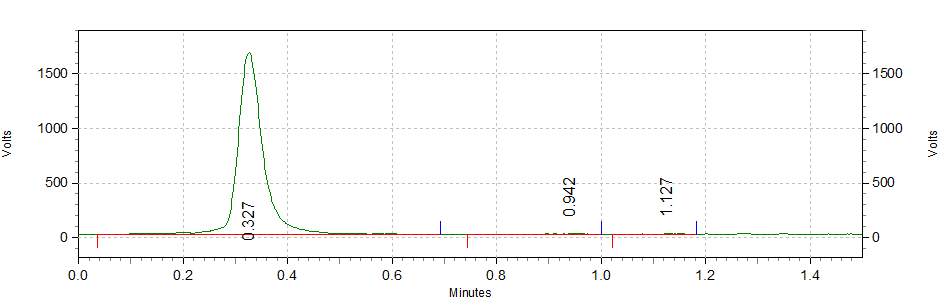


**FIGURE2 C HPLC 99mTC(4.2min)**


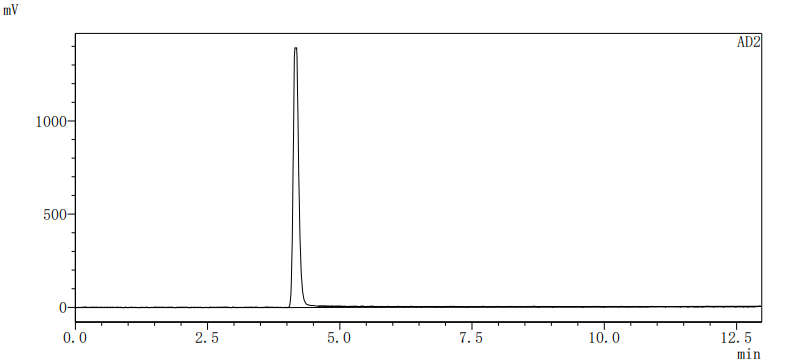


**FIGURE2 D HPLC 99mTC-HYNIC-FAPI(7.5min)**


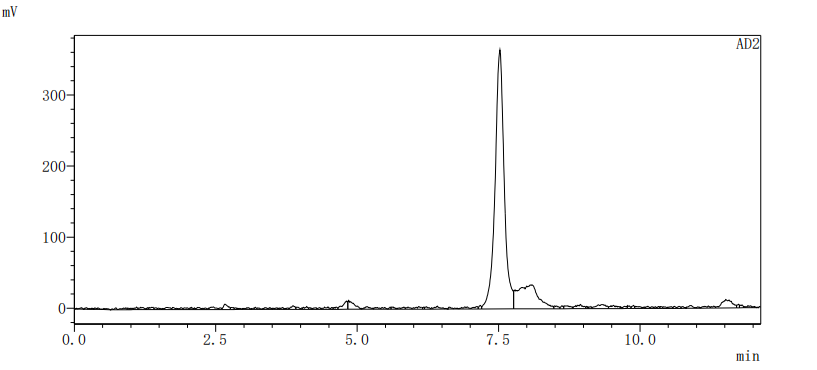

Supplement: Supplementary file 5 [file e63a291ce36a1cf66bf54c13.docx]
