# Supplementary figures and images for: A novel molecular imaging probe 99m Tc-HYNIC-FAPI targeting cancer- associated fibroblasts
Source: Research Square preprint supplement (doi:10.21203/rs.3.rs-2222626/v1), 2022-11-11

**FIGURE 4 raw data**

**Western blot—FAP (95KD)**


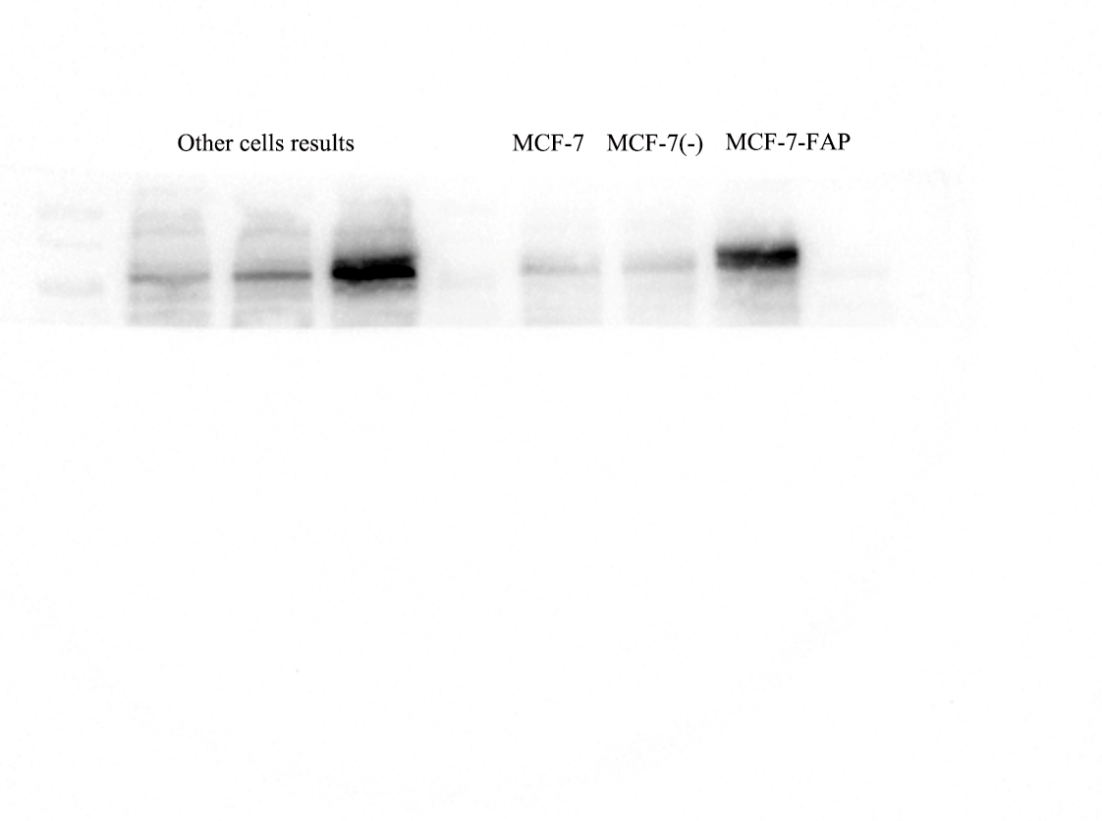


**Western blot—GAPDH (37KD)**


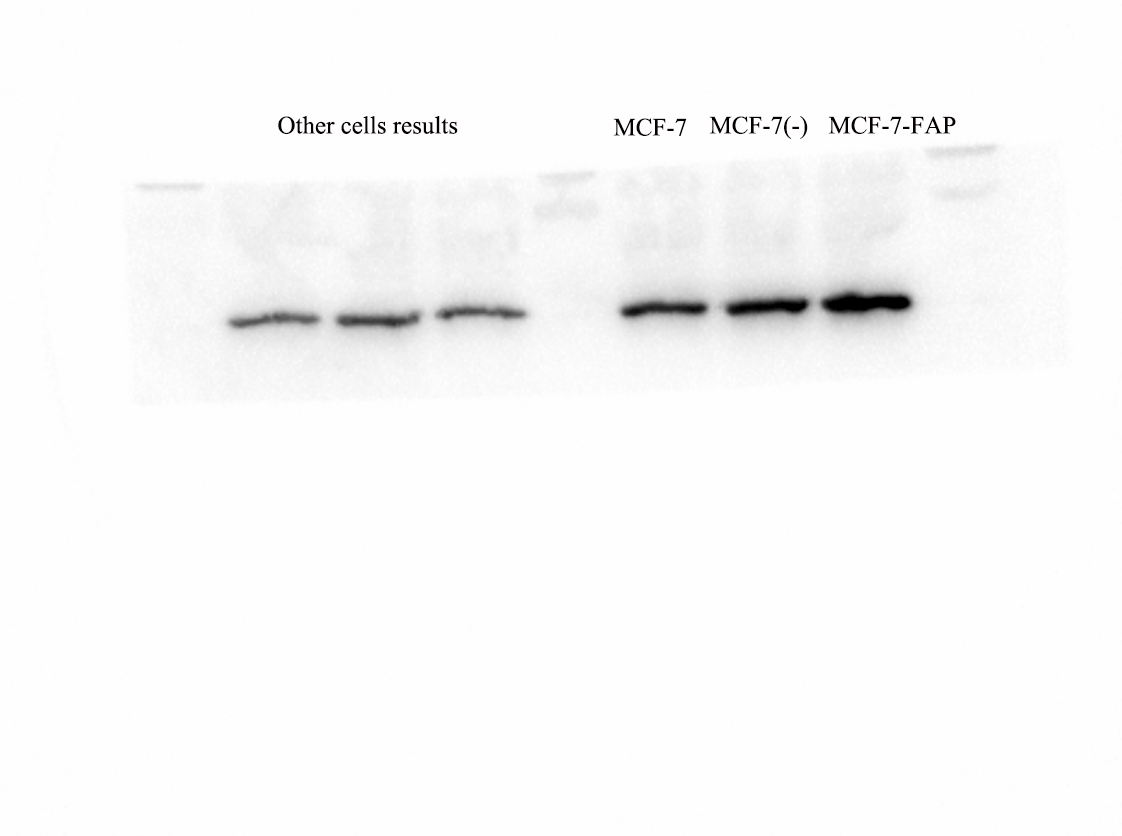

Supplement: Supplementary file 3 [file 16bbc13360f3f05bffd3af62.docx]
